# Supplementary material for: The German Version of the Multidimensional Acculturative Stress Inventory (MASI) for Turkish-Origin Immigrants
Source: Atypon-hosted journal article supplement (doi:10.1027/1015-5759/a000567), 2020-01-24
Supplement: 1015-5759_a000567_esm1.pdf [file 1015-5759_a000567_esm1.pdf]

**ESM 1: The German Version of the Multidimensional Acculturative Stress Inventory (MASI) for Turkish-Origin Immigrants – An Example for Measurement Invariance of Filter Questions**

Doi: 10.1027/1015-5759/a000567

Table E1  
Model Fit Indices of Confirmatory Factor Analyses

|                        | <i>N</i> | $\chi^2$   | <i>df</i> | CFI   | RMSEA                 | SRMR  |
|------------------------|----------|------------|-----------|-------|-----------------------|-------|
| <b>Baseline models</b> |          |            |           |       |                       |       |
| Mexican                | 174      | 664.979*** | 269       | 0.827 | 0.092 [0.084 – 0.100] | 0.083 |
| Turkish                | 233      | 510.768*** | 269       | 0.660 | 0.067 [0.058 – 0.075] | 0.074 |
| <b>Modified models</b> |          |            |           |       |                       |       |
| Mexican                | 174      | 516.737*** | 259       | 0.746 | 0.077 [0.068 – 0.086] | 0.080 |
| Turkish                | 233      | 439.834*** | 259       | 0.887 | 0.076 [0.067 – 0.085] | 0.084 |

*Note.* \*  $p < .05$ , \*\*  $p < .01$ , \*\*\*  $p < .001$ . CFI and RMSEA are scaled. The baseline model is based on the four-factor structure as proposed by Rodriguez et al. (2002). The final measurement models were modified (correlated residuals of items 3 and 5, 3 and 6, 5 and 9, 10 and 13, 11 and 18, 13 and 14, 17 and 19, 19 and 21, and 21 and 23)

**ESM 1: The German Version of the Multidimensional Acculturative Stress Inventory (MASI) for Turkish-Origin Immigrants – An Example for Measurement Invariance of Filter Questions**

Doi: 10.1027/1015-5759/a000567

Table E2

Means, standard deviations, and bivariate correlations between the MASI variables and related constructs in the Turkish group

|                                          | <i>M</i> | <i>SD</i> | F1    | F2    | F3    | F4 | PSS score | Language use <sup>a</sup> | FRACC heritage | FRACC host |
|------------------------------------------|----------|-----------|-------|-------|-------|----|-----------|---------------------------|----------------|------------|
| <i>MASI occurrence of stressor</i>       |          |           |       |       |       |    |           |                           |                |            |
| <b>F1</b> Turkish competency pressures   | 0.08     | 0.16      | 1     |       |       |    | -.02      | .18**                     | -.33**         | .11        |
| <b>F2</b> German competency pressures    | 0.07     | 0.15      | .12   | 1     |       |    | .03       | -.17*                     | .12            | -.24**     |
| <b>F3</b> Pressure to acculturate        | 0.48     | 0.26      | .08   | .23** | 1     |    | .26**     | -.03                      | .30**          | -.52**     |
| <b>F4</b> Pressure against acculturation | 0.17     | 0.24      | .32** | .18** | .31** | 1  | .07       | .07                       | -.17*          | -.04       |
| <i>MASI stress appraisal</i>             |          |           |       |       |       |    |           |                           |                |            |
| <b>F1</b> Turkish competency pressures   | 2.62     | 1.01      | 1     |       |       |    | .24*      | .03                       | -.09           | .16        |
| <b>F2</b> German competency pressures    | 3.00     | 1.12      | .22   | 1     |       |    | .38**     | .11                       | -.16           | -.19       |
| <b>F3</b> Pressure to acculturate        | 3.35     | 0.80      | .16   | .35** | 1     |    | .19**     | -.05                      | .12            | -.26**     |
| <b>F4</b> Pressure against acculturation | 3.03     | 1.16      | .62** | .13   | .40** | 1  | .29**     | -.04                      | .08            | -.17       |

*Note.* \*\*  $p < .01$ , \*  $p < .05$ . <sup>a</sup> binary variable (0 = more Turkish, 1 = more German) PSS = Perceived Stress Scale. FRACC = Frankfurt Acculturation Scale, heritage = orientation towards the heritage culture, host = orientation towards the host culture.

**ESM 1: The German Version of the Multidimensional Acculturative Stress Inventory (MASI) for Turkish-Origin Immigrants – An Example for Measurement Invariance of Filter Questions**

Doi: 10.1027/1015-5759/a000567

Table E3  
Regression analyses with psychological distress as criterion

|                                          | Psychological distress (PSS score)                |                    |                    |                    |                                             |                  |                   |                  |
|------------------------------------------|---------------------------------------------------|--------------------|--------------------|--------------------|---------------------------------------------|------------------|-------------------|------------------|
|                                          | <i>Predicted by MASI – occurrence of stressor</i> |                    |                    |                    | <i>Predicted by MASI – stress appraisal</i> |                  |                   |                  |
|                                          | <b>M1</b>                                         | <b>M2</b>          | <b>M3</b>          | <b>M4</b>          | <b>M5</b>                                   | <b>M6</b>        | <b>M7</b>         | <b>M8</b>        |
| Intercept                                | 2.75 (0.46)**                                     | 2.66 (0.46)**      | 2.18 (0.46)***     | 2.72 (0.47)***     | 0.90 (0.13)                                 | 2.16<br>(0.61)** | 2.29 (0.48)**     | 2.08<br>(0.64)** |
| Age                                      | -0.02 (0.01)*                                     | -0.02* (0.01)      | -0.02 (0.01)*      | -0.02 (0.01)*      | -0.03<br>(0.01)*                            | -0.02 (0.01)     | -0.02* (0.01)     | -0.01 (0.01)     |
| Gender                                   | -0.41<br>(0.11)***                                | -0.40<br>(0.11)*** | -0.39<br>(0.11)*** | -0.40<br>(0.11)*** | -0.37 (0.21)                                | -0.19 (0.22)     | -0.44<br>(0.11)** | -0.38 (0.19)*    |
| Years of education                       | -0.01 (0.03)                                      | -0.00 (0.03)       | 0.01 (0.03)        | -0.01 (0.03)       | 0.13 (0.10)                                 | -0.02 (0.05)     | -0.02 (0.03)      | -0.02 (0.05)     |
| MASI                                     |                                                   |                    |                    |                    |                                             |                  |                   |                  |
| <b>F1</b> Turkish competency pressures   | -0.24 (0.27)                                      | -                  | -                  | -                  | 0.13 (0.08)                                 | -                | -                 | -                |
| <b>F2</b> German competency pressures    | -                                                 | 0.43 (0.30)        | -                  | -                  | -                                           | 0.22<br>(0.07)** | -                 | -                |
| <b>F3</b> Pressure to acculturate        | -                                                 | -                  | 0.67 (0.16)***     | -                  | -                                           | -                | 0.16 (0.06)**     | -                |
| <b>F4</b> Pressure against acculturation | -                                                 | -                  | -                  | 0.04 (0.19)        | -                                           | -                | -                 | 0.13 (0.06)*     |
| $R^2$                                    | .100                                              | .105               | .167               | .097               | .206                                        | .228             | .139              | .119             |
| $F$                                      | 5.93***                                           | 6.26***            | 10.66***           | 5.72***            | 3.95**                                      | 3.54*            | 8.00***           | 2.84*            |
| $\Delta R^2$                             | .003                                              | .008               | .070               | .0002              | .036                                        | .152             | .036              | .056             |
| $\Delta F$                               | 0.79                                              | 2.00               | 17.89***           | 0.05               | 2.78                                        | 9.45**           | 8.27**            | 5.36*            |

**ESM 1: The German Version of the Multidimensional Acculturative Stress Inventory (MASI) for Turkish-Origin Immigrants – An Example for Measurement Invariance of Filter Questions**

Doi: 10.1027/1015-5759/a000567

Observations      218                      218                      218                      218                      66                      53                      204                      89

*Note.* \*  $p < .05$ , \*\*  $p < .01$ , \*\*\*  $p < .001$ . Beta coefficients, standard error in parentheses. Gender: 0=male, 1=female. Models M1-M4 included the MASI factors based on the occurrence of stressor scale and models M5-M8 included the MASI factors based on the stress appraisal scale. PSS = Perceived Stress Scale.

Table E4  
Regression analyses with FRACC Orientation towards the heritage culture as the criterion

|                                   | FRACC Orientation towards the heritage culture    |                  |                  |                  |                                             |                   |                 |                   |      |
|-----------------------------------|---------------------------------------------------|------------------|------------------|------------------|---------------------------------------------|-------------------|-----------------|-------------------|------|
|                                   | <i>Predicted by MASI – occurrence of stressor</i> |                  |                  |                  | <i>Predicted by MASI – stress appraisal</i> |                   |                 |                   |      |
|                                   | <b>M9</b>                                         | <b>M10</b>       | <b>M11</b>       | <b>M12</b>       | <b>M13</b>                                  | <b>M14</b>        | <b>M15</b>      | <b>M16</b>        |      |
| Intercept                         | 5.24<br>(.77)***                                  | 5.02<br>(.02)*** | 4.14<br>(.82)*** | 5.54<br>(.82)*** | 5.84<br>(2.50)*                             | 6.39<br>(1.22)*** | 4.45<br>(.84)** | 5.87<br>(1.15)*** |      |
| Age                               | -0.03 (.02)                                       | -0.03 (.02)      | -0.02 (.02)      | -0.03 (.02)*     | -0.02 (.03)                                 | -0.02 (.02)       | -0.02 (.02)     | -0.04 (.03)       |      |
| Gender                            | 0.24 (.19)                                        | 0.30 (.20)       | 0.33 (.19)       | 0.24 (.20)       | 0.43 (.42)                                  | 0.15 (.43)        | 0.30 (.20)      | 0.55 (.34)        |      |
| Years of education                | -0.04 (.06)                                       | -0.04 (.06)      | -0.02 (.06)      | -0.06 (.06)      | -0.15 (.20)                                 | -0.10 (.09)       | -0.05 (.06)     | -0.15 (.09)       |      |
| MASI                              |                                                   |                  |                  |                  |                                             |                   |                 |                   |      |
| F1 Turkish competency pressures   | -2.32<br>(.46)***                                 | -                | -                | -                | -0.06 (.15)                                 | -                 | -               | -                 |      |
| F2 German competency pressures    | -                                                 | 0.63 (.54)       | -                | -                | -                                           | -0.19 (.14)       | -               | -                 |      |
| F3 Pressure to acculturate        | -                                                 | -                | 1.17<br>(.28)*** | -                | -                                           | -                 | 0.18 (.10)      | -                 |      |
| F4 Pressure against acculturation | -                                                 | -                | -                | 0.82 (.33)*      | -                                           | -                 | -               | 0.15 (.10)        |      |
|                                   | $R^2$                                             | .133             | .033             | .102             | .056                                        | .046              | .090            | .036              | .096 |
|                                   | $F$                                               | 8.15***          | 1.82             | 6.00***          | 3.12*                                       | 0.74              | 1.17            | 1.83              | 2.18 |

**ESM 1: The German Version of the Multidimensional Acculturative Stress Inventory (MASI) for Turkish-Origin Immigrants – An Example for Measurement Invariance of Filter Questions**

Doi: 10.1027/1015-5759/a000567

|              |          |      |          |       |      |      |      |      |
|--------------|----------|------|----------|-------|------|------|------|------|
| $\Delta R^2$ | .106     | .006 | .075     | .028  | .002 | .032 | .017 | .023 |
| $\Delta F$   | 25.97*** | 1.33 | 17.62*** | 6.38* | 0.14 | 1.67 | 3.55 | 2.04 |
| Observations | 217      | 217  | 217      | 217   | 66   | 52   | 203  | 87   |

*Note.* \*  $p < .05$ , \*\*  $p < .01$ , \*\*\*  $p < .001$ . Beta coefficients, standard error in parentheses. Gender: 0=male, 1=female. Models M9-M12 included the MASI factors based on the occurrence of stressor scale and models M13-M16 included the MASI factors based on the stress appraisal scale. FRACC = Frankfurt Acculturation Scale.

Table E5  
Regression analyses with FRACC Orientation towards the host culture as the criterion

|                                        | FRACC Orientation towards the host culture        |                  |                  |                  |                                             |                   |                   |                   |
|----------------------------------------|---------------------------------------------------|------------------|------------------|------------------|---------------------------------------------|-------------------|-------------------|-------------------|
|                                        | <i>Predicted by MASI – occurrence of stressor</i> |                  |                  |                  | <i>Predicted by MASI – stress appraisal</i> |                   |                   |                   |
|                                        | <b>M17</b>                                        | <b>M18</b>       | <b>M19</b>       | <b>M20</b>       | <b>M21</b>                                  | <b>M22</b>        | <b>M23</b>        | <b>M24</b>        |
| Intercept                              | 2.65<br>(.80)**                                   | 3.00<br>(.80)*** | 4.50 (.73)**     | 2.78<br>(.82)*** | 3.63<br>(2.21)                              | 4.22<br>(1.15)*** | 3.73 (.84)***     | 4.16<br>(1.12)*** |
| Age                                    | 0.02 (.02)                                        | 0.02 (.02)       | 0.01 (.01)       | 0.02 (.02)       | 0.01<br>(.02)                               | 0.01 (.02)        | 0.01 (.02)        | -0.00 (.03)       |
| Gender                                 | 0.02 (.02)                                        | -0.01 (.19)      | -0.05 (.17)      | -0.01 (.20)      | -0.22<br>(.37)                              | -0.50 (.41)       | -0.01 (.20)       | -0.36 (.33)       |
| Years of education                     | 0.06 (.06)                                        | 0.04 (.06)       | 0.01 (.05)       | 0.06 (.06)       | -0.03<br>(.18)                              | -0.05 (.08)       | 0.08 (.06)        | 0.01 (.08)        |
| MASI                                   |                                                   |                  |                  |                  |                                             |                   |                   |                   |
| <b>F1</b> Turkish competency pressures | 0.72 (.48)                                        | -                | -                | -                | 0.17<br>(.13)                               | -                 | -                 | -                 |
| <b>F2</b> German competency pressures  | -                                                 | -1.60<br>(.53)** | -                | -                | -                                           | -0.15 (.14)       | -                 | -                 |
| <b>F3</b> Pressure to acculturate      | -                                                 | -                | -2.13<br>(.25)** | -                | -                                           | -                 | -0.36<br>(.10)*** | -                 |
| <b>F4</b> Pressure against             | -                                                 | -                | -                | -0.21 (.33)      | -                                           | -                 | -                 | -0.18 (.10)       |

**ESM 1: The German Version of the Multidimensional Acculturative Stress Inventory (MASI) for Turkish-Origin Immigrants – An Example for Measurement Invariance of Filter Questions**

Doi: 10.1027/1015-5759/a000567

acculturation

|              |      |        |          |      |      |      |          |      |
|--------------|------|--------|----------|------|------|------|----------|------|
| $R^2$        | .021 | .052   | .267     | .012 | .037 | .066 | .070     | .047 |
| $F$          | 1.14 | 2.89*  | 19.28*** | 0.67 | 0.59 | 0.83 | 3.73***  | 1.01 |
| $\Delta R^2$ | .011 | .041   | .256     | .002 | .028 | .025 | .064     | .038 |
| $\Delta F$   | 2.29 | 9.22** | 74.08*** | 0.41 | 1.76 | 1.25 | 13.53*** | 3.23 |
| Observations | 217  | 217    | 217      | 217  | 66   | 52   | 203      | 87   |

---

*Note.* \*  $p < .05$ , \*\*  $p < .01$ , \*\*\*  $p < .001$ . Beta coefficients, standard error in parentheses. Gender: 0=male, 1=female. Models M17-M20 included the MASI factors based on the occurrence of stressor scale and models M21-M24 included the MASI factors based on the stress appraisal scale. FRACC = Frankfurt Acculturation Scale.
