# Supplementary material for: The German Version of the Multidimensional Acculturative Stress Inventory (MASI) for Turkish-Origin Immigrants
Source: Atypon-hosted journal article supplement (doi:10.1027/1015-5759/a000567), 2020-01-24
Supplement: 1015-5759_a000567_esm1.pdf [file 1015-5759_a000567_esm1.pdf]

 


## Login to your account

Email

Password


Forgot password?

Keep me logged in

New User


Shibboleth Login

## Change Password

Old Password

New Password


Too Short
Weak
Medium
Strong
Very Strong
Too Long

#### Your password must have 8 characters or more and contain 3 of the following:

- a lower case character,
- an upper case character,
- a special character
- or a digit

Too Short

## Password Changed Successfully

Your password has been changed

## Create a new account

Email

Already registered? Log in here.

Can't sign in? Forgot your password?

Enter your email address below and we will send you the reset instructions

Email

Cancel

If the address matches an existing account you will receive an email with instructions to reset your password

Close

## Request Username

Can't sign in? Forgot your username?

Enter your email address below and we will send you your username

Email

Close

If the address matches an existing account you will receive an email with instructions to retrieve your username

## Verify Phone

Enter the verification code

Cancel

## Congrats!

Your Phone has been verified

close

Skip to main content

Search

Search

- All contents
- Citation

Quick Search anywhere

Enter words / phrases / DOI / ISBN / keywords / authors / etcSearch

Quick search in Citations

JournalYearVolumeIssuePageSearch

Advanced Search

- 0
- Login | Register
- - English Language is active
    en
  - switch to Deutsch language
    de

Skip main navigation*Close Drawer Menu**Open Drawer Menu*

Home

- Home
- All Journals
- Psychology/Psychiatry
- Nursing
- Medicine
- Open Access
  - OpenMind
  - Open Access Articles
- Continuing Education


- ##### Support & Contact

  ##### Support & Contact

  - Contact
  - FAQ
  - Service

- ##### Legal information

  ##### Legal information

  - Privacy Policy
  - Terms and conditions
  - Conditions of use
  - Copyright / Imprint

- ##### More offers

  ##### More offers

  - Hogrefe Webshop
  - Hogrefe eLibrary
  - DORSCH Online
  - CHPD Online
  - Psychlehrbuchplus

- ##### Our partners

  ##### Our partners

  - CrossRef
  - Counter
  - Portico
  - ScienceOpen
  - Hinari

© 2024 Hogrefe. All rights reserved.

- Powered by Atypon® Literatum
